# Supplementary material
Source: PubMed Central journal article supplement (PMC3147953)
Supplement: supp_85_16_8080__1.pdf [file supp_85_16_8080__1.pdf]

## Supplemental Materials

Table S1. Primers used for the study

| Primer name                                            | HPV18 genome position | Orientation | Sequence                                           |
|--------------------------------------------------------|-----------------------|-------------|----------------------------------------------------|
| <i>Primers used for PCR, RT-PCR and primer walking</i> |                       |             |                                                    |
| oZMZ252, Pr121                                         | nt 121-140            | Forward     | 5'- ATCCAACACGGCGACCCCTAC-3'                       |
| oXHW46, Pr822                                          | nt 822-840            | Forward     | 5'- GCTCAGCAGACGACCTTCG-3'                         |
| oXHW91, Pr3437                                         | nt 3437-3456          | Forward     | 5'- CAGTGACGACACGGTATCCG-3'                        |
| oXHW45, Pr3599                                         | nt 3599-3619          | Forward     | 5'- ACCTGTCAACCCACTTCTCGG-3'                       |
| oXHW47, Pr5487                                         | nt 5487-5505          | Forward     | 5'- CCATTGTATCACCCACGGC-3'                         |
| oXHW98, Pr5777                                         | nt 5777-5799          | Forward     | 5'- TGGTGGCAATAAGCAGGATATTC-3'                     |
| oZMZ253, Pr850                                         | nt 850-833            | Backward    | 5'- CTGGAATGCTCGAAGGTC-3'                          |
| oZMZ229, Pr967                                         | nt 967-948*           | Backward    | 5'- CTGAGTCGAC/AAACCAGCCGTTACAACCCG-3'             |
| oXHW38, Pr3517                                         | nt 3517-3500          | Backward    | 5'- ACGGACACGGTCTGGAA-3'                           |
| oXHW42, Pr3619                                         | nt 3619-3599          | Backward    | 5'- CCGAGAAGTGGGTTGACAGGT-3'                       |
| oXHW43, Pr5504                                         | nt 5504-5486          | Backward    | 5'- CCGTGGGTGATACAATGGG-3'                         |
| oXHW64, Pr5628                                         | nt 5628-5611          | Backward    | 5'- GCCGCCACAAAAGCCATCT-3'                         |
| oXHW44, Pr5793                                         | nt 5793-5773          | Backward    | 5'- CCTGCTTATTGCCACCACCTG-3'                       |
| oXHW48, Pr5935                                         | nt 5935-5915          | Backward    | 5'- CTGTGCTGGAGTGGAAATTGG-3'                       |
| oXHW99, Pr5935                                         | nt 5935-5915*         | Backward    | 5'- TAATACGACTCACTATAGGGA/CCAATTTCCACTCCAGCACAG-3' |
| <i>Primers used for 5' and 3' RACE</i>                 |                       |             |                                                    |
| oXHW90, Pr3976                                         | nt 3976-3996          | Forward     | 5'- TGTATGTGTGCTGCCATGTCC-3'                       |
| oXHW97, Pr7038                                         | nt 7038-7056          | Forward     | 5'- CGTCGCAAGCCCACCATAG-3'                         |
| oXHW86, Pr233                                          | nt 233-209            | Backward    | 5'- CTCTGTAAAGTTCCAATACTGTCTTG-3'                  |
| oZMZ253, Pr850                                         | nt 850-833            | Backward    | 5'- CTGGAATGCTCGAAGGTC-3'                          |
| oZMZ433, Pr904                                         | nt 904-886*           | Backward    | 5'- CACTGAGGTAC/CTGCTGGGATGCACACCAC-3'             |
| oXHW38, Pr3517                                         | nt 3517-3500          | Backward    | 5'- ACGGACACGGTCTGGAA-3'                           |
| oXHW44, Pr5793                                         | nt 5793-5773          | Backward    | 5'- CCTGCTTATTGCCACCACCTG-3'                       |

\* Oligo sequence is attached by a Sal I (oZMZ229), Asp718 (oZMZ433), or T7 (oXHW99) sequence.

FIG. S1. HPV18 L1 initiates its translation at nt 5613 AUG in the HPV18 genome and is smaller by 61-aa residues from the N-terminus of the published hypothetical protein translated from the nt 5430 AUG (15). The authentic HPV18 L1 composes of 507 amino acid residues. Arrow with nt 5613 indicates the first methionine encoded by an AUG codon at the nt 5613 acceptor site of L1 transcript.
