# Supplementary material
Source: PubMed Central journal article supplement (PMC3147953)
Supplement: supp_85_16_8080__2.pdf [file supp_85_16_8080__2.pdf]

|     | nt 5430    | nt 5613    |            |             |            |
|-----|------------|------------|------------|-------------|------------|
| 1   | MCLYTRVLIL | HYHLLPLYGP | LYHPRPLPLH | SILVYMWVHII | ICGHYIILFL |
| 51  | RNVVWFPIFL | QMALWRPSDM | TVYLPPPSVA | RVVNTDDYVT  | PTSIFYHAGS |
| 101 | SRLLTVGNPY | FRVPAGGGNK | QDIPKVSAYQ | YRVFRVQLPD  | PNKFGLPDTS |
| 151 | IYMPETQRLV | WACAGVEIGR | GOPLGVGLSG | HPFYMKLDDT  | ESSHAATSNV |
| 201 | SEDVRDNVSV | DYKQTQLCIL | GCAPAIGEHU | AKGTACKSRP  | LSQGDCPPLE |
| 251 | LKNTVLEDGD | MVDTGYGAMD | FSTLQDTKCE | VPLDICQSIC  | KYPDYLQMSA |
| 301 | DPYGDSMFFC | LRREQLFARH | FUNRAGTMGD | TVPQSLYIKG  | TGMPASPGSC |
| 351 | VYSPSPSGSI | VTSDSQLFNK | PYULHKAQGH | NNGVCWVHNQL | FVTVVDTPPS |
| 401 | TNLTICASTQ | SPVPGQYDAT | KFKQYSRHVE | EYDLQFIFQL  | CTITLTADVW |
| 451 | SYIHSMNSSI | LEDWVFGVPP | PPTSLVDYTY | RFVQSVAITC  | QKDAAPAENK |
| 501 | DPYDKLKFVN | VDLKEKFSLD | LDQYPLGRKF | LVQAGLRRKP  | TIGPRKRSAP |
| 551 | SATTSSKPAK | RVRVRARK*  |            |             |            |

Fig. S1
